# Supplementary material for: The K2(9-ethylguanine)122+ quadruplex is more stable to unimolecular dissociation than the K(9-ethylguanine)8+ quadruplex in the gas phase: a BIRD, energy resolved SORI-CID, IRMPD spectroscopic, and computational study
Source: Royal Society of Chemistry journal article supplement (doi:10.1039/c9cp01651a), 2019-01-01
Supplement: c9cp01651a1.pdf [file c9cp01651a1.pdf]

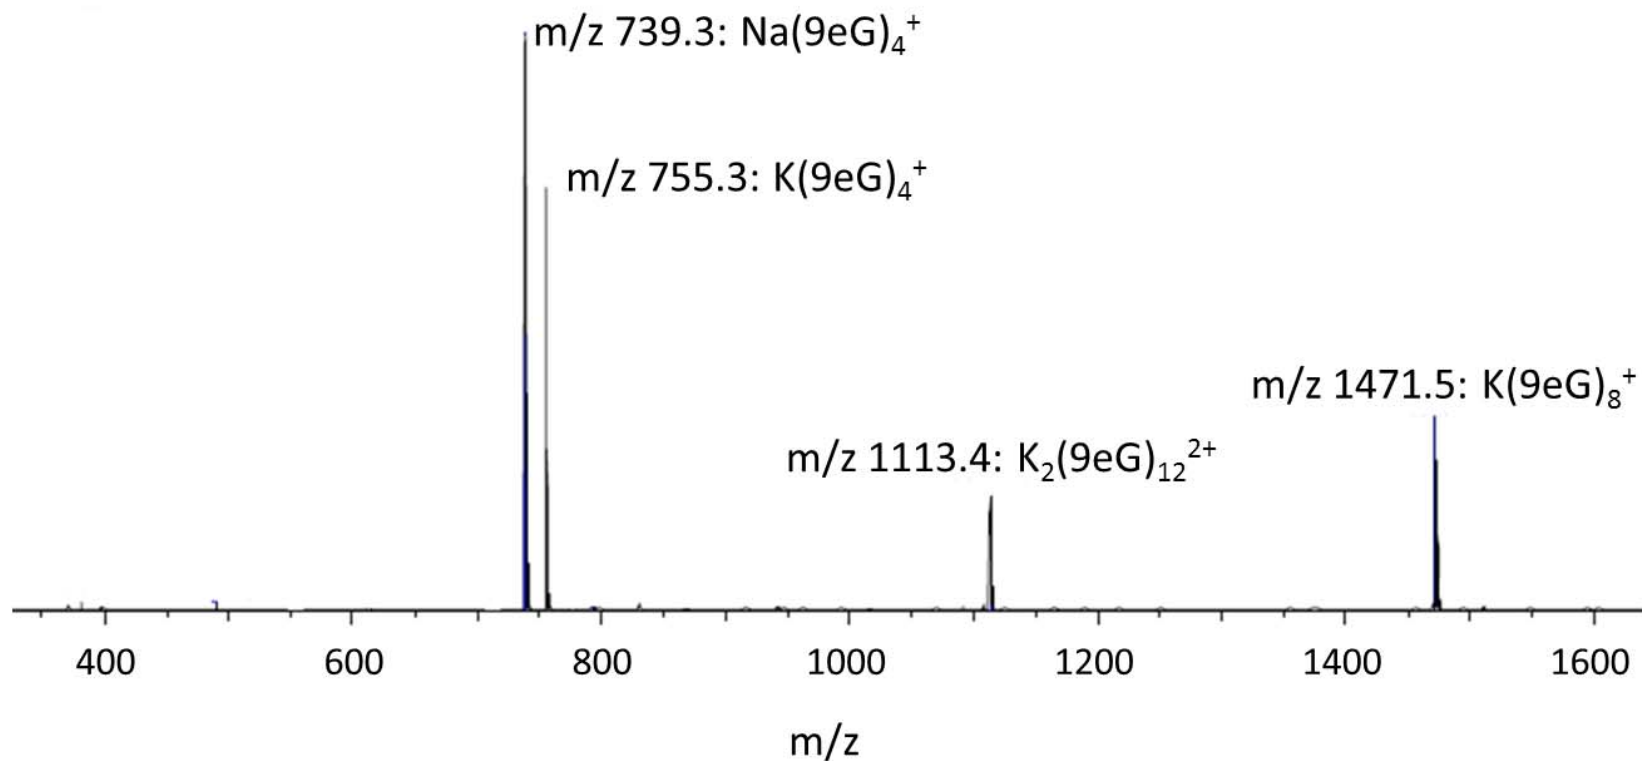

Figure S1. Electrospray mass spectrum of an aqueous solution containing 10 mL of 0.1 mM solution of 9-ethylguanine with two drops of 0.1 mM KCl. Note that K(9eG)<sub>12</sub><sup>2+</sup> is the largest potassiated G-quadruplex detected.

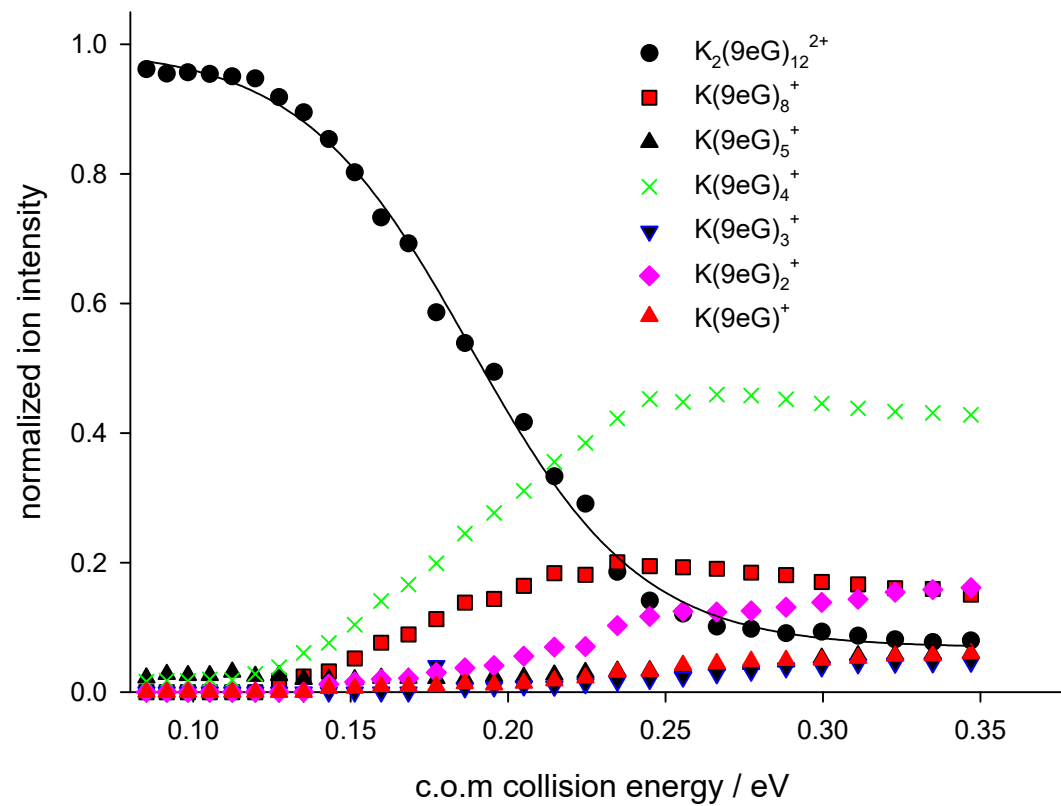

Figure S2. Energy resolved intensity profiles for SORI-CID of the  $K_2(9eG)_{12}^{2+}$ .

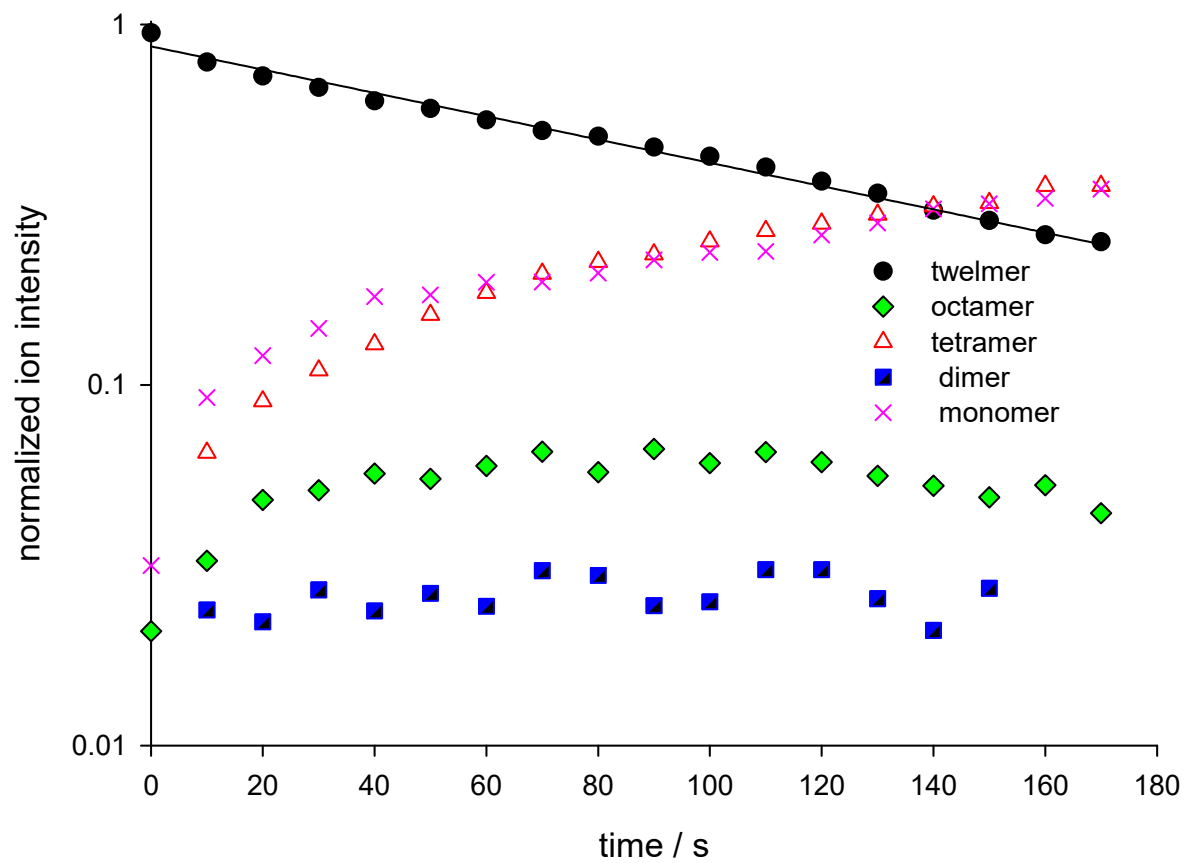

Figure S3. BIRD kinetics plot for  $K_2(9eG)_{12}^{2+}$  at 385 K.
